# Supplementary material for: Risk for Infection with Highly Pathogenic Influenza A Virus (H5N1) in Chickens, Hong Kong, 2002
Source: Emerg Infect Dis. 2007 Mar;13(3):412–8. doi: 10.3201/eid1303.060365 (PMC2725907; doi:10.3201/eid1303.060365)
Supplement: Appendix Table — Items in case-control study questionnaire to investigate avian influenza type A virus (H5N1) virus infection, Hong Kong, 2002 [file 06-0365_appT-s1.pdf]

Appendix Table. Items in case-control study questionnaire to investigate avian influenza type A virus (H5N1) virus infection, Hong Kong, 2002

| Items                   | Factors                                                                                |
|-------------------------|----------------------------------------------------------------------------------------|
| Farm profiles           |                                                                                        |
| Physical description    | Location, area, topography, truck accessibility                                        |
| Other animals           | Pig farm, other species (include pet birds, wild birds, etc)                           |
| Pond, stream            | Inside, outside, wild birds                                                            |
| Fence                   | Full, incomplete                                                                       |
| Water source            | Town supply, well, mountain water, tank cover                                          |
| Stock                   |                                                                                        |
| Chicken and others      | Number                                                                                 |
| Day-old chicks          | Source, numbers, unload area (outside, inside farm)                                    |
| Local farm chickens     | Buy in, sell to                                                                        |
| Vaccination history     | Age administered, types, manufacturers and suppliers of vaccines                       |
| Flock health history    | Respiratory, digestive, neurologic symptoms, demeanor                                  |
| Survival rates          | Age group, time period before outbreak                                                 |
| Medication to chicken   | Types, suppliers, date of administration                                               |
| Feed source             | Types, suppliers, date of delivery, mode of transportation                             |
| Feed on farm            | Sell to other farms, wild birds in feed store, feed trough                             |
| Water system            | Drip, cup, trough                                                                      |
| Sell to market          | Date, number, catcher, retail/wholesale                                                |
| Cages                   | Source (retail, wholesale), cleanliness                                                |
| Pick-up truck           | Enters farm                                                                            |
| Sheds                   |                                                                                        |
| Shed                    | Number, ventilation, floor cover, wild birds access                                    |
| Free-range              | Age groups, types and sources of bedding materials                                     |
| Stocking density        | Cage size, number of chickens per cage                                                 |
| Cage cleaning post-sale | Method, detergent used, cage empty time                                                |
| Manure scraper          | Installation, frequency                                                                |
| Farm management         |                                                                                        |
| Owner                   | Live on farm, own other farm, wholesale or retail stall, relatives in poultry industry |
| Farm workers            | Number, origin                                                                         |
| Visit outside farm      | Mainland, other local farm                                                             |
| Visitors                | Number, occupation (farmer, wholesaler, retailer, feed company), enter shed            |
| Biosecurity             | Detergent at entrance, visitors wear protective cloth while entering the shed          |
| Transportation          | Chicken, feed                                                                          |
| Manure disposal         | Frequency of collection, truck enters the farm                                         |
| Waste water disposal    | Soak away tank or other, tank cover                                                    |
| Dead chicken disposal   | Dead stock collection point, waste pit on farm                                         |
